# Supplementary material for: Phase transformation, ionic diffusion, and charge transfer mechanisms of KVOPO4 in potassium ion batteries: first-principles calculations
Source: Royal Society of Chemistry journal article supplement (doi:10.1039/c8ta06708b), 2018-01-01
Supplement: c8ta06708b1.pdf [file c8ta06708b1.pdf]

# **Phase Transformation, Ionic Diffusion, and Charge Transfer Mechanisms of KVOPO<sub>4</sub> in Potassium Ion Batteries: First-principles Calculations**

Ruqian Lian<sup>a</sup>, Dashuai Wang<sup>a</sup>, Xing Ming<sup>b</sup>, Rongyu Zhang<sup>c</sup>, Yingjin Wei<sup>a,\*</sup>, Jianrui Feng<sup>a</sup>,

Xing Meng<sup>a</sup>, Gang Chen<sup>a</sup>

<sup>a</sup> Key Laboratory of Physics and Technology for Advanced Batteries (Ministry of Education),  
College of Physics, Jilin University, Changchun 130012, China.

<sup>b</sup> College of Science, Guilin University of Technology, Guilin 541004, China.

<sup>c</sup> College of New Energy, Bohai University, Jinzhou 121000, China.

\* Corresponding author

Email: yjwei@jlu.edu.cn (Y. J. Wei); Tel: 86-431-85155126

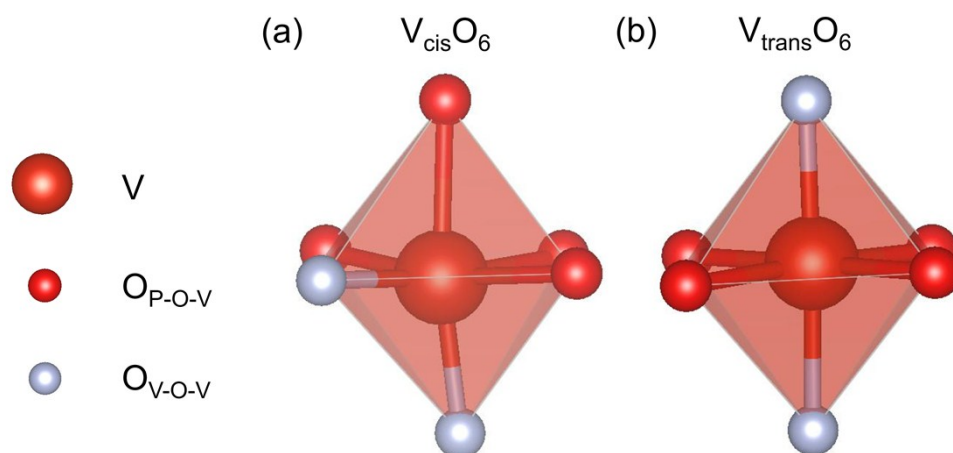

**Figure S1.** Schematic diagram of  $V_{\text{cis}}O_6$  and  $V_{\text{trans}}O_6$ .  $O_{\text{P-O-V}}$  is corner-shared O that connects  $VO_6$  octahedra and  $PO_4$  tetrahedra,  $O_{\text{V-O-V}}$  is corner-shared O that connects two  $VO_6$  octahedra.

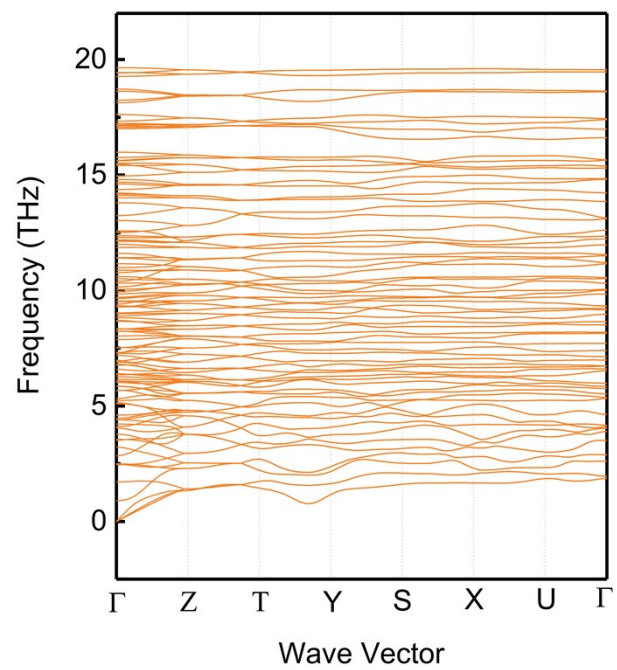

**Figure S2.** Calculated phonon band structures for VOPO<sub>4</sub>.

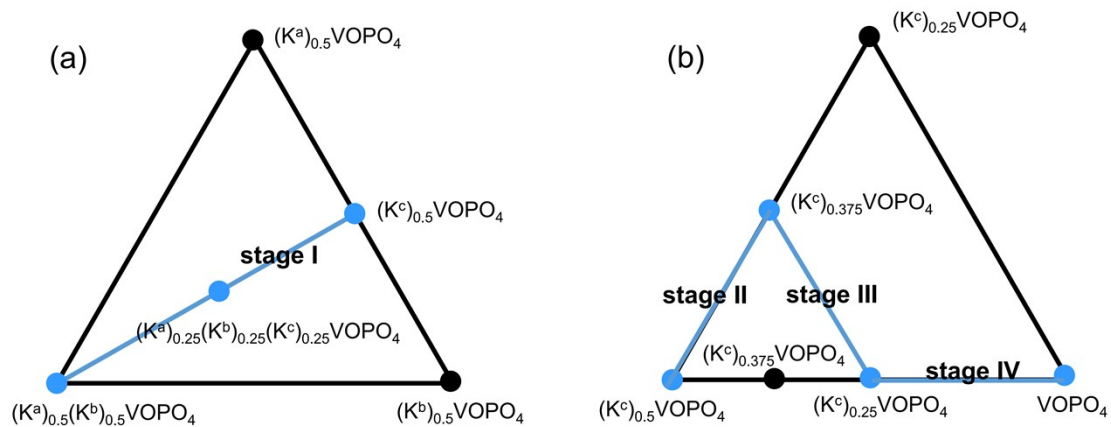

**Figure. S3.** Phase diagrams for (a) stage I and (b) stage II ~ IV. Blue circles represent the stable phase of  $K_xVOPO_4$  during K extraction, and black circles represent metastable phases with relatively higher energy.

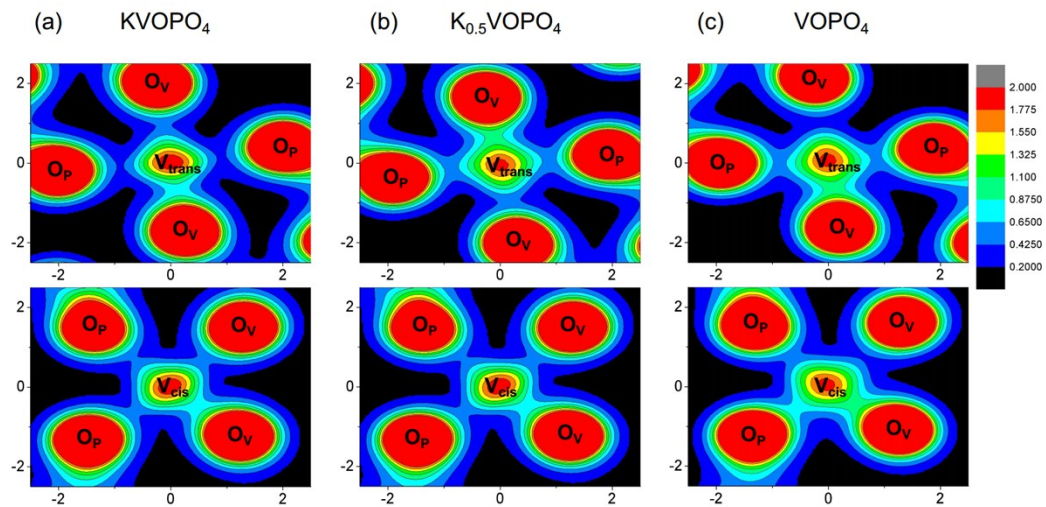

**Fig. S4.** Electron density distribution of V-O bonds in (a)  $\text{KVOPO}_4$ , (b)  $\text{K}_{0.5}\text{VOPO}_4$ , and (c)  $\text{VOPO}_4$ .

**Table S1.** Calculated lattice parameters and atomic positions of KVOPO<sub>4</sub>

| KVOPO <sub>4</sub>                                                                  |         |       |       |       |
|-------------------------------------------------------------------------------------|---------|-------|-------|-------|
| a = 12.891 Å; b = 6.428 Å; c = 10.527 Å; V = 872.3 Å <sup>3</sup> ; α = β = γ = 90° |         |       |       |       |
| atom                                                                                | Wychoff | x     | y     | z     |
| O (1)                                                                               | 4a      | 0.482 | 0.478 | 0.135 |
| O (2)                                                                               | 4a      | 0.510 | 0.471 | 0.370 |
| O (3)                                                                               | 4a      | 0.400 | 0.194 | 0.271 |
| O (4)                                                                               | 4a      | 0.592 | 0.187 | 0.231 |
| O (5)                                                                               | 4a      | 0.110 | 0.310 | 0.532 |
| O (6)                                                                               | 4a      | 0.111 | 0.690 | 0.475 |
| O (7)                                                                               | 4a      | 0.255 | 0.534 | 0.620 |
| O (8)                                                                               | 4a      | 0.256 | 0.456 | 0.392 |
| O (9)                                                                               | 4a      | 0.281 | 0.546 | 0.879 |
| O (10)                                                                              | 4a      | 0.273 | 0.458 | 0.132 |
| K (1)                                                                               | 4a      | 0.375 | 0.779 | 0.302 |
| K (2)                                                                               | 4a      | 0.105 | 0.696 | 0.055 |
| P (1)                                                                               | 4a      | 0.497 | 0.331 | 0.250 |
| P (2)                                                                               | 4a      | 0.181 | 0.500 | 0.505 |
| V (1)                                                                               | 4a      | 0.375 | 0.497 | 0     |
| V (2)                                                                               | 4a      | 0.247 | 0.267 | 0.244 |

**Table S2.** Energies of three  $K_{1-x}VOPO_4$  ( $0 \leq x \leq 1.0$ ) configurations, corresponding to Figure 3

| Concentration | $E_a$ (eV/f.u.) | $E_b$ (eV/ f.u.)        | $E_c$ (eV/ f.u.) |
|---------------|-----------------|-------------------------|------------------|
| $x = 0$       |                 | $E_{KVOPO_4} = -457.46$ |                  |
| $x = 0.125$   | -451.92         | /                       | -452.11          |
| $x = 0.25$    | -446.30         | /                       | -446.73          |
| $x = 0.375$   | -441.10         | /                       | -441.18          |
| $x = 0.5$     | -435.45         | -435.31                 | -435.62          |
| $x = 0.625$   | -429.84         | -429.57                 | -429.85          |
| $x = 0.75$    | -424.01         | -423.70                 | -424.00          |
| $x = 0.875$   | -418.07         | -417.98                 | -417.97          |
| $x = 1$       |                 | $E_{VOPO_4} = -412.24$  |                  |

**Table S3.** Calculated lattice parameters and atomic positions of  $\text{K}_{0.5}\text{VOPO}_4$ 

| $\text{K}_{0.5}\text{VOPO}_4$                                                                                                        |         |       |       |       |
|--------------------------------------------------------------------------------------------------------------------------------------|---------|-------|-------|-------|
| $A = 12.667 \text{ \AA}; b = 6.315 \text{ \AA}; c = 10.467 \text{ \AA}; V = 837.3 \text{ \AA}^3; \alpha = \beta = \gamma = 90^\circ$ |         |       |       |       |
| atom                                                                                                                                 | Wychoff | x     | y     | z     |
| O (1)                                                                                                                                | 4a      | 0.488 | 0.487 | 0.136 |
| O (2)                                                                                                                                | 4a      | 0.510 | 0.466 | 0.376 |
| O (3)                                                                                                                                | 4a      | 0.398 | 0.194 | 0.263 |
| O (4)                                                                                                                                | 4a      | 0.594 | 0.188 | 0.230 |
| O (5)                                                                                                                                | 4a      | 0.114 | 0.325 | 0.528 |
| O (6)                                                                                                                                | 4a      | 0.114 | 0.709 | 0.471 |
| O (7)                                                                                                                                | 4a      | 0.264 | 0.562 | 0.607 |
| O (8)                                                                                                                                | 4a      | 0.256 | 0.474 | 0.377 |
| O (9)                                                                                                                                | 4a      | 0.282 | 0.559 | 0.869 |
| O (10)                                                                                                                               | 4a      | 0.277 | 0.471 | 0.120 |
| K (1)                                                                                                                                | 4a      | 0.403 | 0.842 | 0.442 |
| P (1)                                                                                                                                | 4a      | 0.497 | 0.338 | 0.253 |
| P (2)                                                                                                                                | 4a      | 0.185 | 0.516 | 0.496 |
| V (1)                                                                                                                                | 4a      | 0.375 | 0.518 | 0.010 |
| V (2)                                                                                                                                | 4a      | 0.245 | 0.250 | 0.251 |



**Table S4.** Lengths of the first- and second-shortest K-V and K-P bonds in  $\text{K}_{0.5}\text{VOPO}_4$  and  $\text{K}_{0.125}\text{VOPO}_4$

| Length                        | $\text{K}_{0.5}\text{VOPO}_4$ |              | $\text{K}_{0.125}\text{VOPO}_4$ |              |
|-------------------------------|-------------------------------|--------------|---------------------------------|--------------|
|                               | $\text{K}^b$                  | $\text{K}^c$ | $\text{K}^b$                    | $\text{K}^c$ |
| $L_{\text{K-V}} (\text{\AA})$ | 3.660                         | 3.715        | 3.607                           | 3.603        |
|                               | 3.757                         | 3.775        | 3.722                           | 3.629        |
| $L_{\text{K-P}} (\text{\AA})$ | 3.500                         | 3.505        | 3.446                           | 3.479        |
|                               | 3.630                         | 3.691        | 3.623                           | 3.597        |
